## RESEARCH ARTICLE

# Critically ill patients with community-onset intraabdominal infections: Influence of healthcare exposure on resistance rates and mortality

Emilio Maseda<sup>1,2\*</sup>, Sofía Ramírez<sup>1,2</sup>, Pedro Picatto<sup>3</sup>, Eva Peláez-Peláez<sup>4</sup>, Carlos García-Bernedo<sup>5</sup>, Nazario Ojeda-Betancur<sup>6</sup>, Gerardo Aguilar<sup>7</sup>, Beatriz Forés<sup>8</sup>, Jorge Solera-Marín<sup>9</sup>, María Aliaño-Piña<sup>10</sup>, Eduardo Tamayo<sup>11</sup>, Fernando Ramasco<sup>12</sup>, Raquel García-Álvarez<sup>13</sup>, Ada González-Lisorge<sup>14</sup>, María-José Giménez<sup>15,16</sup>, Alejandro Suárez-de-la-Rica<sup>1,2</sup>, for the HELP Investigators and the Perioperative Infection Research Group<sup>¶</sup>

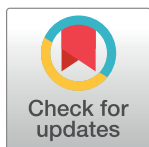

## OPEN ACCESS

**Citation:** Maseda E, Ramírez S, Picatto P, Peláez-Peláez E, García-Bernedo C, Ojeda-Betancur N, et al. (2019) Critically ill patients with community-onset intraabdominal infections: Influence of healthcare exposure on resistance rates and mortality. PLoS ONE 14(9): e0223092. <https://doi.org/10.1371/journal.pone.0223092>

**Editor:** Shane Patman, University of Notre Dame Australia, AUSTRALIA

**Received:** September 19, 2018

**Accepted:** September 15, 2019

**Published:** September 26, 2019

**Copyright:** © 2019 Maseda et al. This is an open access article distributed under the terms of the [Creative Commons Attribution License](https://creativecommons.org/licenses/by/4.0/), which permits unrestricted use, distribution, and reproduction in any medium, provided the original author and source are credited.

**Data Availability Statement:** The Spanish legislation specially protects health data. Following clinical practice, data from patients in the study were recorded in their corresponding medical records at participating hospitals. The anonymous datasets used and/or analyzed during the study are available from the corresponding author on reasonable request and with permission of the corresponding hospital director and the Ethics Committee. Requests could be sent to the Ethics Committee of Hospital Universitario La Paz

**1** Anesthesiology and Surgical Critical Care Dpt., Hospital Universitario La Paz, Madrid, Spain, **2** Universidad Autónoma de Madrid, Madrid, Spain, **3** Anesthesiology and Surgical Critical Care Dpt., Hospital Universitario Central de Asturias, Oviedo, Spain, **4** Anesthesiology and Surgical Critical Care Dpt., Hospital Universitario Vall d'Hebron, Barcelona, Spain, **5** Anesthesiology and Surgical Critical Care Dpt., Hospital del Mar, Barcelona, Spain, **6** Anesthesiology and Surgical Critical Care Dpt., Hospital Universitario de Gran Canaria Dr. Negrín, Las Palmas de Gran Canaria, Spain, **7** Anesthesiology and Surgical Critical Care Dpt., Hospital Clínico Universitario, Valencia, Spain, **8** Anesthesiology and Surgical Critical Care Dpt., Hospital Universitario Basurto, Bilbao, Spain, **9** Anesthesiology and Surgical Critical Care Dpt., Hospital Universitario de Canarias, Santa Cruz de Tenerife, Spain, **10** Anesthesiology and Surgical Critical Care Dpt., Hospital Virgen de la Salud, Toledo, Spain, **11** Anesthesiology and Surgical Critical Care Dpt., Hospital Clínico Universitario, Valladolid, Spain, **12** Anesthesiology and Surgical Critical Care Dpt., Hospital Universitario de la Princesa, Madrid, Spain, **13** Anesthesiology and Surgical Critical Care Dpt., Hospital Universitario 12 de Octubre, Madrid, Spain, **14** Anesthesiology and Surgical Critical Care Dpt., Hospital Clínico Universitario Virgen de la Arrixaca, Murcia, Spain, **15** PRISM-AG, Madrid, Spain, **16** Universidad Europea, Madrid, Spain

¶ Membership of the HELP study and the Perioperative Infection Research Group is provided in the Acknowledgments.

\* [emilio.maseda@gmail.com](mailto:emilio.maseda@gmail.com)

## Abstract

The concept of healthcare-associated infections (as opposed to hospital-acquired infections) in intraabdominal infections (IAIs) is scarcely supported by data in the literature. The aim of the present study was to analyse community-onset IAIs (non-postoperative/non-nosocomial) in patients admitted to intensive care units (ICUs), to investigate differences in resistance patterns linked to healthcare exposure and mortality-associated factors. A one-year prospective observational study (17 Spanish ICUs) was performed distributing cases as healthcare-associated infections (HCAI), community-acquired infections (CAI) and immunocompromised patients (ICP). Bacteria producing extended-spectrum  $\beta$ -lactamases (ESBL) and/or carbapenemase (CPE), high-level aminoglycoside- and/or methicillin- and/or vancomycin- resistance were considered antimicrobial resistant (AMR). Mortality-associated factors were identified by regression multivariate analysis. Of 345 patients included (18.8% HCAI, 6.1% ICP, 75.1% CAI), 51.6% presented generalized peritonitis; 32.5% were >75 years (55.4% among HCAI). Overall, 11.0% cases presented AMR (7.0% ESBL- and/or CPE), being significantly higher in HCAI (35.4%) vs. CAI (5.8%) ( $p < 0.001$ ) vs. ICP (0%) ( $p = 0.003$ ). Overall 30-day mortality was 14.5%: 23.1% for HCAI and 11.6% for CAI ( $p = 0.016$ ).

(Madrid, Spain) which was the committee that approved the study protocol at the following email address: [sol.gracia@salud.madrid.org](mailto:sol.gracia@salud.madrid.org).

**Funding:** This multicentre study was possible due to the generous implication of the personnel in the 17 participating ICUs. The study did not receive external funding. One of the authors [MJG] is employee of a commercial company (PRISM-AG) which was not funder of the present study. This company only provided support in the form of the salary for this author [MJG], but did not have any role in the study design, data collection and analysis, decision to publish, or preparation of the manuscript. The specific role of this author is articulated in the 'author contributions' section.

**Competing interests:** E.M. has served as speaker for Merck, Sharp & Dohme (MSD), Pfizer and Astellas; and has received educational grants from Astellas. F.R. has served as speaker for MSD. G.A. has served as speaker for MSD, Astellas, Gilead, and Pfizer and received educational grants from Astellas, Pfizer and MSD. M-JG is employee of PRISM-AG and has received an educational grant from Fundación Micellium para el Desarrollo y Difusión del Conocimiento Científico (Valencia, Spain). The remaining authors have disclosed that they do not have any potential conflicts of interest. This does not alter our adherence to PLOS ONE policies on sharing data and materials.

Mortality ( $R^2 = 0.262$ ,  $p = 0.021$ ) was positively associated with age >75 years (OR = 6.67, 95%CI = 2.56–17.36,  $p < 0.001$ ), *Candida* isolation (OR = 3.05, 95%CI = 1.18–7.87,  $p = 0.022$ ), and SAPS II (per-point, OR = 1.08, 95%CI = 1.05–1.11,  $p < 0.001$ ) and negatively with biliary infections (OR = 0.06, 95%CI = 0.01–0.48,  $p = 0.008$ ). In this study, the antimicrobial susceptibility pattern of bacteria isolated from patients with healthcare contact was shifted to resistance, suggesting the need for consideration of the healthcare category (not including hospital-acquired infections) for severe IAIs. 30-day mortality was positively related with age >75 years, severity and *Candida* isolation but not with AMR.

## Introduction

Complicated intra-abdominal infections (IAIs) are severe infections requiring early adequate empirical treatment in addition to control of infectious foci. Approximately 40% of all patients diagnosed with secondary peritonitis need ICU treatment [1], IAIs being the second most common cause of sepsis [2]. Reported mortality rates of severe secondary peritonitis have only slightly decreased over the last decades, and range from 20% to 60% [1,3], thus remaining as an important field for research. The increasingly advanced age of the population (with the associated burden of chronic diseases), and the increased diagnosis in patients with impaired host defences complicate even more outcomes and increase mortality [3,4].

Since there is general agreement on the prime importance of controlling early source to reduce mortality [4–6], nowadays, the focus is on improving early empirical antimicrobial treatments. Inadequate empirical treatments are those providing inadequate coverage of the potential microorganisms involved, their resistance traits being of special importance. For complicated IAIs, the traditional binary classification (in-/out-hospital patient) may be not fully resolute for identification of patients at risk for antibiotic-resistant infections since non-hospitalized patients having contact with healthcare settings may be nonetheless at risk. Furthermore, resistant isolates are increasingly being isolated from patients without risk factors for healthcare/hospital-acquired infections [4,7,8], this representing a challenge for selecting initial antibiotic treatment.

The AGORA initiative [9] and the 2017's guidelines by The Surgical Infection Society [4] differentiate community-acquired IAIs and healthcare-associated IAIs, with presumed differences in resistance patterns between both categories [9]. But in both documents, hospital-acquired infections are considered as part of healthcare-associated infections [4,9]. In IAIs the concept of healthcare-associated infections as opposed to hospital-acquired infections (unlike what occurs for bacteraemia and pneumonia) is scarcely supported by published data [10] and, traditionally, it is not considered a category different from nosocomial and community-acquired IAIs [11]. However, in contrast to the widely described resistance in pathogens responsible of nosocomial IAIs [12,13], there are few data from healthcare-associated and community-acquired IAIs to help in identifying risks factors for infections by resistant pathogens [4]. In addition, if the presence of multi-drug resistant bacteria implies higher severity, as it occurs for other pathologies [14], needs also further clarification.

We designed the prospective observational multicentre HELP study to describe characteristics of IAIs having community-onset (i.e. non-postoperative/non-nosocomial), in patients that due to their severity required ICU management, to investigate possible differences in antibiotic resistance patterns between patients with and without healthcare exposure, and factors associated with mortality.

## Material and methods

The HELP study (HELP = HEaLthcare-associated intra-abdominal infections study in critically ill Patients) was a prospective, observational, multicentre study conducted in 17 ICUs in Spanish University hospitals. These centres included all consecutive adult patients ( $\geq 18$  yr), admitted in the ICU after surgical treatment for control of the infectious foci, having as diagnosis non-postoperative/non-nosocomial IAIs. All patients must have an intraoperative microbiological sample (peritoneal fluid) collected for culture. The study included patients entering the ICUs between November 1<sup>st</sup> 2014 and October 31<sup>th</sup> 2015. IAIs following surgery (post-operative) or those diagnosed in patients admitted for  $\geq 48$  hours (nosocomial) were excluded. The study protocol was approved by the Ethics Committee of Hospital La Paz, Madrid, Spain. Participants were asked to sign a written consent at entry in the ICU. The study was performed in accordance with the ethical standards laid down in the Declaration of Helsinki (Edinburgh, October 2000).

Patients were divided in three groups: patients with healthcare-associated infections (HCAI), patients with community-acquired infections (CAI) and immunocompromised patients (ICP). HCAI was defined as an infection in patients with at least one of the following criteria: i) Hospitalization in an acute care hospital for  $\geq 48$  hours within 90 days prior to the onset of infection, ii) Residence in nursing homes or extended-care facilities, iii) Home infusion therapy including antibiotics, iv) Chronic dialysis within 30 days prior to the onset of infection, v) Domiciliary wound care, and/or vi) Family member carrying multidrug-resistant pathogens [15]. ICP were considered patients with immunosuppressive treatment, chemotherapy, corticosteroid therapy for at least 4 weeks before onset of infection, solid organ transplant, and/or HIV-positive patients [15]. IAIs that did not fill exclusion criteria and criteria for HCAI or ICP were considered CAI. Patients presenting criteria for classification as ICP and HCAI were assigned to the HCAI group.

Demographic, clinical and microbiological data, empirical antimicrobial treatment, complications, length of stay, and outcome (mortality in the ICU and 30-day mortality) were recorded. Adequacy of source control was evaluated considering criteria previously described [16]. The previous functional status (Barthel index) [17], the Sequential Organ Failure Assessment (SOFA) [18] and the Simplified Acute Physiologic Score-II (SAPS II) [19] scores were calculated using clinical data at ICU admission. Blood and intraoperative intra-abdominal fluid samples were collected and immediately sent to the Microbiology laboratory of each centre for processing following standard methods in daily practice. Isolated bacteria presenting extended-spectrum  $\beta$ -lactamases (ESBL) and/or carbapenemase production (for gram-negatives) and/or high-level aminoglycoside resistance (HLAR) and/or resistance to vancomycin and/or methicillin resistance (for gram-positives) were considered antimicrobial resistant pathogens (AMR).

Differences between groups were assessed by t-test or U-Mann-Whitney non-parametric tests (continuous variables) or by Chi square/Fisher exact tests (discrete variables). For the comparisons between the three groups (HCAI, CAI and ICP), due to the multiple comparisons performed, the Bonferroni correction was applied and the resulting level of significance was rounded down and set at  $p \leq 0.01$ . A stepwise logistic regression multivariate analysis was conducted in order to determine variables associated with 30-day mortality. All variables showing differences in the two-group data (survivors/dead) analyse ( $p < 0.05$ ) were included. Interactions and linear dependence between independent variables were previously controlled. The significant model ( $p < 0.05$ ) showing the maximum parsimony (the lowest number of variables without significant reduction in the value of the determination coefficient) and the highest  $R^2$  was considered. All statistical calculations were computed using SPSS v.14.

## Results

A total of 360 outpatients with IAIs (non-postoperative/non-nosocomial) were considered in the 17 participating ICUs during the one-year study period. Fifteen were excluded due to missing data, and 345 patients remained as evaluable for the study analysis. Of them, 18.8% (65 out of 345) were HCAI cases, 6.1% (21 out of 345) were ICP cases, and the remaining 75.1% (259 out of 345) were cases of CAI. Up to 51.6% patients presented generalized peritonitis, without difference by groups. Table 1 shows demographic data by type of infection. Source control was considered adequate in 311 (90.1%) cases, without differences by study group. Colon was the most frequent infection site in all groups: up to ~62% cases among ICPs, a percentage higher than for CAI (32.8%) (p = 0.007). Patients with HCAI presented significantly higher mean age (p<0.001) and abscess formation (p = 0.004) while patients with CAI presented higher percentage of infections involving the appendix compared to HCAI (p<0.001).

Table 2 shows comorbidities, severity scores and complications by type of infection. Significantly higher percentages of patients with congestive heart disease, chronic renal failure, and malignancies were found in the HCAI versus CAI groups; values of SAPS II and SOFA were also higher (p<0.001). Malignancies and liver disease were more frequent among ICP versus CAI cases (p<0.001). Septic shock was the most frequent complication in all groups, being significantly more frequent in HCAI (>50% cases) than in CAI.

Only 10.7% patients presented positive blood culture; among them, the most frequent isolate was *E. coli* (3.2%), without differences between groups. Among bacteria isolated from peritoneal fluid, the percentage of AMR was 11.0%, being 7.0% for ESBL- and/or carbapenemase-producing enterobacteria. Overall, the percentage of AMR was significantly higher in HCAI

Table 1. Demographic and clinical data.

| Variable                                       | HCAI <sup>a</sup> (n = 65) | CAI <sup>a</sup> (n = 259) |        | ICP <sup>a</sup> (n = 21) |            |           |
|------------------------------------------------|----------------------------|----------------------------|--------|---------------------------|------------|-----------|
|                                                |                            |                            |        | p vs. HCAI                | p vs. HCAI | p vs. CAI |
| Age (years; mean ± SD)                         | 72.5 ± 15.2                | 62.3 ± 17.5                | <0.001 | 61.0 ± 16.2               | ns         | ns        |
| Age >75 years [n (%)]                          | 36 (55.4)                  | 72 (27.8)                  | <0.001 | 4 (19.0)                  | 0.003      | ns        |
| Males                                          | 35 (53.8)                  | 143 (55.2)                 | ns     | 13 (61.9)                 | ns         | ns        |
| Days in hospital pre-ICU admission (mean ± SD) | 2.3 ± 8.4                  | 0.6 ± 0.9                  | ns     | 1.0 ± 1.5                 | ns         | ns        |
| Adequate control of infectious foci            | 58 (89.2)                  | 236 (91.1)                 | ns     | 17 (81.0)                 | ns         | ns        |
| <b>Site of infection</b>                       |                            |                            |        |                           |            |           |
| Stomach                                        | 9 (13.8)                   | 47 (18.1)                  | ns     | 0 (0.0)                   | ns         | ns        |
| Small bowel                                    | 13 (20.0)                  | 28 (10.8)                  | ns     | 2 (9.5)                   | ns         | ns        |
| Biliary tract                                  | 18 (27.7)                  | 43 (16.6)                  | ns     | 3 (14.3)                  | ns         | ns        |
| Appendix                                       | 2 (3.1)                    | 56 (21.6)                  | <0.001 | 3 (14.3)                  | ns         | ns        |
| Colon                                          | 23 (35.4)                  | 85 (32.8)                  | ns     | 13 (61.9)                 | ns         | 0.007     |
| <b>Type of infection/process</b>               |                            |                            |        |                           |            |           |
| Generalized peritonitis                        | 32 (49.2)                  | 131 (50.6)                 | ns     | 15 (71.4)                 | ns         | ns        |
| Localized peritonitis                          | 15 (23.1)                  | 83 (32.0)                  | ns     | 3 (14.3)                  | ns         | ns        |
| Abscess                                        | 12 (18.5)                  | 18 (6.9)                   | 0.004  | 0 (0.0)                   | ns         | ns        |
| GI <sup>b</sup> perforation                    | 6 (9.2)                    | 27 (10.4)                  | ns     | 3 (14.3)                  | ns         | ns        |
| <b>Negative peritoneal culture</b>             | 7 (10.5)                   | 48 (18.5)                  | ns     | 0 (0.0)                   | ns         | ns        |

Demographic and clinical data by type of peritonitis. Data expressed as n (%) except where indicated

<sup>a</sup>HCAI: Healthcare-associated infection; CAI: Community-associated infection; ICP: Immunocompromised patients

<sup>b</sup>GI: Gastro-intestinal

ns: non-significant (p>0.01)

<https://doi.org/10.1371/journal.pone.0223092.t001>

**Table 2. Comorbidities, severity scores and complications.**

| Variable                                   | HCAI <sup>a</sup> (n = 65) | CAI <sup>a</sup> (n = 259) |        | ICP <sup>a</sup> (n = 21) |            |           |
|--------------------------------------------|----------------------------|----------------------------|--------|---------------------------|------------|-----------|
|                                            |                            |                            |        | p vs. HCAI                | p vs. HCAI | p vs. CAI |
| <b>Barthel index (mean ± SD)</b>           | 71.8 ± 24.9                | 89.3 ± 13.1                | <0.001 | 85.2 ± 12.2               | 0.007      | ns        |
| <b>Comorbidities</b>                       |                            |                            |        |                           |            |           |
| Congestive heart disease                   | 12 (18.5)                  | 10 (3.9)                   | <0.001 | 3 (14.3)                  | ns         | ns        |
| Chronic Obstructive Pulmonary Disease      | 8 (12.3)                   | 31 (12.0)                  | ns     | 0 (0.0)                   | ns         | ns        |
| Diabetes mellitus                          | 13 (20.0)                  | 42 (16.2)                  | ns     | 3 (14.3)                  | ns         | ns        |
| Liver disease                              | 3 (4.6)                    | 12 (3.6)                   | ns     | 6 (28.6)                  | 0.002      | <0.001    |
| Chronic renal failure                      | 12 (18.5)                  | 16 (6.2)                   | 0.001  | 3 (14.3)                  | ns         | ns        |
| Alcoholism                                 | 11 (16.9)                  | 26 (10.0)                  | ns     | 3 (14.3)                  | ns         | ns        |
| Malignancies                               | 17 (26.2)                  | 30 (11.6)                  | 0.003  | 9 (42.9)                  | ns         | <0.001    |
| <b>Severity (mean ± SD)</b>                |                            |                            |        |                           |            |           |
| SAPS II <sup>b</sup>                       | 46.6 ± 14.7                | 37.0 ± 16.0                | <0.001 | 42.3 ± 17.4               | ns         | ns        |
| Sequential Organ Failure Assessment (SOFA) | 6.3 ± 3.1                  | 4.2 ± 3.6                  | <0.001 | 6.3 ± 2.5                 | ns         | ns        |
| Lactate (mmol/l)                           | 2.5 ± 2.8                  | 2.4 ± 2.2                  | ns     | 2.4 ± 2.2                 | ns         | ns        |
| <b>Complications</b>                       |                            |                            |        |                           |            |           |
| Acute respiratory distress syndrome        | 4 (6.2)                    | 18 (6.9)                   | ns     | 0 (0.0)                   | ns         | ns        |
| Mechanical ventilation >24h                | 20 (30.8)                  | 54 (20.8)                  | ns     | 8 (38.1)                  | ns         | ns        |
| Noninvasive mechanical ventilation >24h    | 7 (10.8)                   | 29 (11.2)                  | ns     | 1 (4.8)                   | ns         | ns        |
| Septic shock                               | 33 (50.8)                  | 79 (30.5)                  | 0.002  | 12 (57.1)                 | ns         | ns        |
| Disseminated intravascular coagulation     | 4 (6.2)                    | 11 (4.2)                   | ns     | 0 (0.0)                   | ns         | ns        |
| Acute renal failure                        | 24 (36.9)                  | 70 (27.0)                  | ns     | 9 (42.9)                  | ns         | ns        |
| Renal replacement therapy                  | 4 (6.2)                    | 19 (7.3)                   | ns     | 3 (14.3)                  | ns         | ns        |

Comorbidities, severity scores and complications. Data expressed as n (%) except where indicated

<sup>a</sup>HCAI: Healthcare-associated infection; CAI: Community-associated infection; ICP: Immunocompromised patients

<sup>b</sup>SAPS II: Simplified Acute Physiologic Score-II

ns: non-significant (p>0.01)

<https://doi.org/10.1371/journal.pone.0223092.t002>

(23/65; 35.4%) vs. CAI (15/259; 5.8%) (p<0.001) or vs. ICP (0/21; 0%) (p = 0.003), without differences between CAI and ICP (p = 0.641).

Table 3 shows per species percentage of isolation of aerobic/facultative bacteria from peritoneal fluid. Isolation of ESBL-and/or carbapenemase- producing bacteria was significantly more frequent from HCAI than CAI patients (p<0.001), with significant higher percentages of ESBL-producing *E. coli* (p = 0.030) and *Klebsiella* spp. (p = 0.001). These type of isolates were not found among enterobacteria isolated from ICP patients. Isolation of enterococci was significantly more frequent from HCAI than CAI (33.8% vs. 17.8%, p = 0.004), with higher percentage of isolates showing HLR [9 out of 22 (40.9%) vs. 3 out of 46 (6.5%) for HCAI vs. CAI isolates].

No differences in total gram-negative anaerobic bacteria isolation were found between groups. ICP patients presented significantly higher rates of *Clostridium* spp. isolation compared with patients with CAI (23.8% vs. 4.7%; p = 0.005). Overall, isolation of *Candida* spp. occurred in 19.1% (66 out of 345) patients, without differences between groups (23.1% for HCAI, 17.8% for CAI and 23.8% for ICP).

Table 4 shows empirical antimicrobial treatment by group. Piperacillin-tazobactam was significantly more frequent as empirical treatment in CAI than in ICP (p = 0.008), while the use of carbapenems (and among them, meropenem) was significantly more frequent in ICPs vs. HCAI or CAI (p<0.01). Treatment with tigecycline and daptomycin was significantly more



Table 3. Microbiological data.

| Bacteria                                             | HCAI <sup>a</sup> (n = 65) | CAI <sup>a</sup> (n = 259) |        | ICP <sup>a</sup> (n = 21) |            |           |
|------------------------------------------------------|----------------------------|----------------------------|--------|---------------------------|------------|-----------|
|                                                      |                            |                            |        | p vs. HCAI                | p vs. HCAI | p vs. CAI |
| <b>Total Enterobacteria</b>                          | 48 (73.8)                  | 169 (65.3)                 | ns     | 17 (81.0)                 | ns         | ns        |
| <i>E. coli</i> (Total)                               | 31 (47.7)                  | 119 (45.9)                 | ns     | 13 (61.9)                 | ns         | ns        |
| <i>E. coli</i> (ESBL <sup>b</sup> )                  | 5 (7.7)                    | 5 (1.9)                    | ns     | 0 (0.0)                   | 0.009      | ns        |
| <i>E. coli</i> (CPE <sup>c</sup> )                   | 2 (3.1)                    | 2 (0.8)                    | ns     | 0 (0.0)                   | ns         | ns        |
| <b>Klebsiella spp (Total)</b>                        | 11 (16.9)                  | 33 (12.7)                  | ns     | 3 (14.3)                  | ns         | ns        |
| <i>Klebsiella</i> spp (ESBL <sup>b</sup> )           | 4 (6.2)                    | 0 (0.0)                    | 0.001  | 0 (0.0)                   | ns         | ns        |
| <i>Klebsiella</i> spp (CPE <sup>c</sup> )            | 1 (1.5)                    | 0 (0.0)                    | ns     | 0 (0.0)                   | ns         | ns        |
| <b>Enterobacter spp (Total)</b>                      | 3 (4.6)                    | 11 (4.2)                   | ns     | 1 (4.8)                   | ns         | ns        |
| <i>Enterobacter</i> spp (ESBL <sup>b</sup> )         | 1 (1.5)                    | 4 (1.5)                    | ns     | 0 (0.0)                   | ns         | ns        |
| <b>Total ESBL<sup>b</sup> enterobacteria</b>         | 10 (15.4)                  | 9 (3.5)                    | 0.001  | 0 (0.0)                   | ns         | ns        |
| <b>Total CPE<sup>c</sup></b>                         | 3 (4.6)                    | 2 (0.8)                    | ns     | 0 (0.0)                   | ns         | ns        |
| <b>Total ESBL<sup>b</sup> and/or CPE<sup>c</sup></b> | 13 (20.0)                  | 11 (4.2)                   | <0.001 | 0 (0.0)                   | ns         | ns        |
| <b>Pseudomonas spp.</b>                              | 1 (1.5)                    | 16 (6.2)                   | ns     | 3 (14.3)                  | ns         | ns        |
| <b>Total gram-positive bacteria</b>                  | 39 (60.0)                  | 112 (43.2)                 | ns     | 7 (33.3)                  | ns         | ns        |
| <b>Total Enterococcus</b>                            | 22 (33.8)                  | 46 (17.8)                  | 0.004  | 2 (9.5)                   | ns         | ns        |
| <i>E. faecalis</i>                                   | 5 (7.7)                    | 17 (6.6)                   | ns     | 1 (4.8)                   | ns         | ns        |
| <i>E. faecium</i> (Total)                            | 11 (16.9)                  | 16 (6.2)                   | 0.005  | 1 (4.8)                   | ns         | ns        |
| <i>E. faecium</i> (HLAR <sup>d</sup> )               | 6 (9.2)                    | 1 (0.4)                    | <0.001 | 0 (0.0)                   | ns         | ns        |
| <i>Enterococcus</i> spp. (Total)                     | 6 (9.2)                    | 13 (5.0)                   | ns     | 0 (0.0)                   | ns         | ns        |
| <i>Enterococcus</i> spp. (HLAR <sup>d</sup> )        | 3 (4.6)                    | 2 (0.8)                    | ns     | 0 (0.0)                   | ns         | ns        |
| <i>Enterococcus</i> spp. (vancomycin-resistant)      | 1 (1.5)                    | 1 (0.4)                    | ns     | 0 (0.0)                   | ns         | ns        |
| <b>Total HLAR<sup>d</sup> bacteria</b>               | 9 (13.8)                   | 3 (1.2)                    | <0.001 | 0 (0.0)                   | ns         | ns        |

Per species, percentage of isolation of aerobe/facultative bacteria from peritoneal fluid. Data are expressed as n (%).

<sup>a</sup>HCAI: Healthcare-associated infection; CAI: Community-associated infection; ICP: Immunocompromised patients

<sup>b</sup>ESBL: extended spectrum β-lactamase-producing

<sup>c</sup>CPE: carbapenemase-producing

<sup>d</sup>HLAR: High-level aminoglycoside resistance

ns: non-significant ns: non-significant (p>0.01)

<https://doi.org/10.1371/journal.pone.0223092.t003>

frequent in HCAI and ICP than in CAI patients. Antifungals were used in a total of 13% patients, without differences between groups.

Table 5 shows length of stay and outcome by type of infection. No differences in the variables analysed were found between groups. In the subgroup of patients >75 years (n = 112), no significant differences (p = 0.452) in 30-day mortality were found between groups: 12/36 (33.3%) for HCAI; 19/72 (26.4%) for CAI and 0/4 for ICP.

The ICP group was excluded from the multivariate analysis due to its low number of patients, remaining 324 patients (279 surviving and 45 dead patients). Variables showing differences in the two-group data analysis (those included in the multivariate analysis) are shown in Table 6. Different models were performed. The Hosmer-Lemeshow test and the performance of the models were evaluated, being always <0.01. The significant (p<0.05) model showing the maximum parsimony and the highest R<sup>2</sup> (R<sup>2</sup> = 0.262, p = 0.021) indicated age >75 years (OR = 6.67, 95%CI = 2.56–17.36, p<0.001), *Candida* isolation from peritoneal fluid (OR = 3.05, 95%CI = 1.18–7.87, p = 0.022), and SAPS II (per point, OR = 1.08, 95%CI = 1.05–1.11, p<0.001) as variables positively associated with mortality, and biliary tract as site of

Table 4. Antimicrobial treatment.

| Antimicrobials                      | HCAI <sup>a</sup> (n = 65) | CAI <sup>a</sup> (n = 259) |        | ICP <sup>a</sup> (n = 21) |            |           |
|-------------------------------------|----------------------------|----------------------------|--------|---------------------------|------------|-----------|
|                                     |                            |                            |        | p vs. HCAI                | p vs. HCAI | p vs. CAI |
| <b>Total β-lactams</b>              | 62 (0.95)                  | 266 (1.03)                 | ns     | 22 (1.05)                 | ns         | ns        |
| <b>Penicillins (Total)</b>          | 33 (0.51)                  | 165 (0.64)                 | ns     | 6 (0.29)                  | ns         | 0.001     |
| Amoxicillin/clavulanic acid         | 5 (0.08)                   | 56 (0.22)                  | ns     | 0 (0.00)                  | ns         | ns        |
| Piperacillin/tazobactam             | 28 (0.43)                  | 109 (0.42)                 | ns     | 6 (0.29)                  | ns         | 0.008     |
| <b>Cephalosporins (Total)</b>       | 4 (0.06)                   | 21 (0.08)                  | ns     | 2 (0.10)                  | ns         | ns        |
| Cefotaxime                          | 3 (0.05)                   | 18 (0.07)                  | ns     | 1 (0.05)                  | ns         | ns        |
| Ceftriaxone                         | 1 (0.02)                   | 2 (0.01)                   | ns     | 1 (0.05)                  | ns         | ns        |
| Ceftazidime                         | 0 (0.00)                   | 1 (0.00)                   | ns     | 0 (0.00)                  | -          | ns        |
| <b>Carbapenems (Total)</b>          | 23 (0.35)                  | 79 (0.31)                  | ns     | 14 (0.67)                 | ns         | 0.001     |
| Imipenem                            | 1 (0.02)                   | 15 (0.06)                  | ns     | 1 (0.05)                  | ns         | ns        |
| Meropenem                           | 17 (0.26)                  | 35 (0.14)                  | ns     | 12 (0.57)                 | 0.009      | <0.001    |
| Ertapenem                           | 5 (0.08)                   | 29 (0.11)                  | ns     | 1 (0.05)                  | ns         | ns        |
| <b>Monobactams (Aztreonam)</b>      | 2 (0.03)                   | 1 (0.00)                   | ns     | 0 (0.00)                  | ns         | ns        |
| <b>Total aminoglycosides</b>        | 4 (0.06)                   | 15 (0.06)                  | ns     | 2 (0.10)                  | ns         | ns        |
| <b>Total quinolones</b>             | 2 (0.03)                   | 5 (0.02)                   | ns     | 1 (0.05)                  | ns         | ns        |
| <b>Glycylcyclines (Tigecycline)</b> | 9 (0.14)                   | 7 (0.03)                   | <0.001 | 3 (0.14)                  | ns         | 0.006     |
| <b>Daptomycin</b>                   | 4 (0.06)                   | 2 (0.01)                   | 0.004  | 2 (0.10)                  | ns         | 0.001     |
| <b>Linezolid</b>                    | 4 (0.06)                   | 16 (0.06)                  | ns     | 4 (0.19)                  | ns         | ns        |
| <b>Metronidazole</b>                | 7 (0.11)                   | 27 (0.10)                  | ns     | 3 (0.14)                  | ns         | ns        |
| <b>Total antifungals</b>            | 10 (0.15)                  | 29 (0.11)                  | ns     | 6 (0.29)                  | ns         | ns        |

Antimicrobials used as empirical treatment. Data are expressed as n (ratio of per-patient antimicrobial use).

<sup>a</sup>HCAI: Healthcare-associated infection; CAI: Community-associated infection; ICP: Immunocompromised patients  
 ns: non-significant (p>0.01)

<https://doi.org/10.1371/journal.pone.0223092.t004>

infection (OR = 0.06, 95%CI = 0.01–0.48, p = 0.008) as variable negatively associated with mortality.

### Discussion

Up to 17 Spanish UCIs participated in this observational study analysing severe IAs having community-onset. Our results confirm for this entity the difference of resistance patterns in community patients with and without healthcare exposure, since isolation of AMR from

Table 5. Length of stay and outcome in the ICU.

| Variable                                                   | HCAI <sup>a</sup> (n = 65) | CAI <sup>a</sup> (n = 259) |    | ICP <sup>a</sup> (n = 21) |            |           |
|------------------------------------------------------------|----------------------------|----------------------------|----|---------------------------|------------|-----------|
|                                                            |                            |                            |    | p vs. HCAI                | p vs. HCAI | p vs. CAI |
| <b>Length of stay in the ICU [days; median (IQR)]</b>      | 4.0 (1.0–7.0)              | 2.0 (1.0–6.0)              | ns | 5.0 (1.0–8.5)             | ns         | ns        |
| <b>Length of hospital stay [days; median (IQR)]</b>        | 17.0 (10.5–27.0)           | 12.0 (8.0–24.0)            | ns | 19.0 (13.0–46.5)          | ns         | ns        |
| <b>Mortality in the ICU [n (%)]</b>                        | 3 (4.6)                    | 21 (8.1)                   | ns | 4 (19.0)                  | ns         | ns        |
| <b>Mortality within 30 days of infection onset [n (%)]</b> | 15 (23.1)                  | 30 (11.6)                  | ns | 5 (23.8)                  | ns         | ns        |

Length of stay and outcome by type of peritonitis

<sup>a</sup>HCAI: Healthcare-associated infection; CAI: Community-associated infection; ICP: Immunocompromised patients  
 IQR: Interquartile range  
 ns: non-significant (p>0.01)

<https://doi.org/10.1371/journal.pone.0223092.t005>

peritoneal fluid was significantly more frequent from HCAI versus CAI. However, in the multivariate analysis no association between AMR and 30-day mortality was found. On the contrary, our 30-day mortality was positively associated with age >75 years, *Candida* isolation from peritoneal fluid, and values of SAPS II, and negatively associated with biliary tract as site of infection.

Therapeutic recommendations are based, among others, on the severity of the infection, age, patient's status captured by scoring systems [4,20], and the possibility of multidrug resistant bacteria in relation to the origin of the infection [4,21]. In the present study, the different characteristics of patients in the study groups were in line with all these criteria: patients with healthcare exposure were significantly older, presented higher severity at admission, and presented more frequently AMR than CAI cases. Therefore, from the microbiological perspective (AMR), our results validate the category of healthcare-associated IAIs as opposed to community infections. This constitutes the main difference with other studies investigating risk factors for IAIs by multidrug resistant pathogens which considered hospital-acquired infections among healthcare-associated infections [22,23].

The profile of pathogens isolated from peritoneal samples was in accordance with previous studies, with similar percentages of enzymatic resistance in enterobacteria (20% for HCAI and 4.2% for CAI) [24,25], and isolation rates of enterococci significantly higher in HCAI than CAI, as in a previous study on community-onset healthcare-associated IAIs [26]. An interesting finding was the low rate of non-fermenters found, probably in relation to the community-onset of infections, since additional pathogenic bacteria as *P. aeruginosa* and yeasts must be considered in hospital-associated complicated IAIs and in immunocompromised hosts [27]. The reduced number of ICP patients limited its analysis, not allowing for drawing conclusions. *Candida* spp. was the third most frequent microorganism isolated after *E. coli* and enterococci, without differences in isolation rates between HCAI and CAI. The overall percentage of *Candida* isolation in our study was high, and similar to the percentage found in critically ill patients with secondary and tertiary abdominal sepsis [28]. Nevertheless, postoperative peritonitis has different microbiological features than non-postoperative nosocomial IAIs and CAIs, where the similar frequency of yeast isolation has been reported [29].

Surprisingly, AMR (as defined in the present study) were not isolated from ICP patients, possibly due to the reduced number of ICP cases included. But, on the contrary, AMR were found in 5.8% of the patients not having contact with healthcare, thus, theoretically, not presenting risk factors for harbouring resistant bacteria. In this sense, the lack of difference in isolation of ESBL-producing *E. coli* between HCAI and CAI illustrates the extension of the risk for resistance beyond the healthcare settings to the community. The presence of resistant *E. coli* isolates in the community is increasing over time, as confirmed in the SMART Program, where the rate of multidrug-resistant *E. coli* was more than double from 2009 to 2013 among community-associated IAIs [30].

In the present study, overall mortality was similar to the one described in other studies on non-post-operative intraabdominal infections [31,32]. The multivariate analysis did not identify AMR as variable associated with 30-day mortality. A previous study in ICU-acquired bloodstream infections showed similar results, the pathogen resistance pattern not impacting attributable mortality [33]. In our study, the 30-day mortality relied on other classical parameters as advanced age and severity, and microbiological parameters as isolation of *Candida* spp. Nevertheless, despite its statistical significance, interpretations of these results need caution since for age a substantial OR value was accompanied by a large confidence interval, and for SAPS II the magnitude of effect was an OR = 1.08 per point increased in the score. However, our results are well supported by the literature. In a previous study on acute secondary peritonitis, age older than 80 years showed to be an independent risk factor of mortality regardless



Table 6. Significant data in two-group data analysis.

| Variable                                                    | Survivors<br>(n = 279) | Dead<br>(n = 45) | p      |
|-------------------------------------------------------------|------------------------|------------------|--------|
| Age >75 years                                               | 77 (27.6)              | 31 (68.9)        | <0.001 |
| HCAI <sup>a</sup>                                           | 50 (17.9)              | 15 (33.3)        | 0.017  |
| Small bowel as site of infection                            | 29 (10.4)              | 12 (26.7)        | 0.002  |
| Biliary tract as site of infection                          | 60 (21.5)              | 1 (2.2)          | 0.002  |
| Appendix as site of infection                               | 55 (19.7)              | 3 (6.7)          | 0.034  |
| Generalized peritonitis                                     | 132 (47.3)             | 31 (68.9)        | 0.007  |
| Localized peritonitis                                       | 93 (33.3)              | 5 (11.1)         | 0.003  |
| Congestive heart disease                                    | 14 (5.0)               | 8 (17.8)         | 0.005  |
| Chronic renal failure                                       | 18 (6.5)               | 10 (22.2)        | 0.002  |
| Lactate $\geq 3$ mmol/l                                     | 59 (21.1)              | 20 (44.4)        | 0.001  |
| SAPS II <sup>b</sup> >46 points                             | 63 (22.6)              | 32 (71.1)        | <0.001 |
| Isolation of CPE <sup>c</sup> from peritoneal fluid         | 2 (0.7)                | 3 (6.7)          | 0.021  |
| Isolation of <i>Enterobacter</i> spp. from peritoneal fluid | 5 (1.8)                | 4 (8.9)          | 0.024  |
| Isolation of <i>Candida</i> spp. from peritoneal fluid      | 40 (14.3)              | 13 (28.9)        | 0.027  |

Variables (values at admission) introduced in the multivariate model for the HCAI<sup>a</sup> + CAI<sup>a</sup> population based on the significant ( $p < 0.05$ ) differences between survivors and dead patients. Data expressed as n (%).

<sup>a</sup>HCAI: Healthcare-associated infection; CAI: Community-associated infection

<sup>b</sup>SAPS II: Simplified Acute Physiologic Score-II

<sup>c</sup>CPE: carbapenemase-producing Enterobacteria

<https://doi.org/10.1371/journal.pone.0223092.t006>

the Mannheim Peritonitis Index score [34]. Similarly, several studies have concluded the increased mortality associated with isolation of *Candida* [35,36], also in patients with complicated non-postoperative IAIs [32].

The strength of the present prospective descriptive study was the inclusion of all patients with community-onset severe IAIs admitted in a large number of ICUs in Spain over one year. Time of source control was not available in our study, this representing a study limitation. Other inherent limitations of descriptive studies (absence of sample size calculation, variability in routine laboratory procedures, lack of standardized criteria for hospital discharge. . .) weakness conclusions, although, on the other hand, discloses actual bacterial isolation and therapeutic management of this entity in clinical practice. Importantly, the analysis of the empirical treatments selected by treating physicians suggests an influence of the awareness of possible resistance in certain patients, since there was a more frequent utilization of broad-spectrum antibiotics in the HCAI and ICP groups. This could have negatively influenced the multivariate analysis for AMR and 30-day mortality. In this context, the lack of assessment of the adequacy of empirical antimicrobial treatments represents a study limitation, although without influence on epidemiological AMR results.

## Conclusion

Despite AMR (as defined in the present study) were not isolated from ICP patients (possibly due to the reduced number of ICP cases included), the results of this study showed that the antimicrobial susceptibility pattern of bacteria isolated from patients with healthcare contact was shifted to resistance, suggesting the need for consideration of the healthcare category (not including hospital-acquired infections) for severe IAIs. According to our results, treating physicians facing the management of severe IAIs should consider not only the patient's age and

severity at admission (risk factors for mortality) but also healthcare exposure as risk factor for multidrug resistance even in IAIs having community-onset.

## Acknowledgments

### Investigators of the HELP study and the Perioperative Infection Research Group:

González-Lisorge A., García-Palenciano C., Ercole G.A. (H. Clínico Universitario Virgen de la Arrixaca, Murcia, Spain), Aguilar G., Carrizo J., Serralta F., Martínez-Castro S., Gracia E. (H. Clínico Universitario, Valencia, Spain), Ojeda-Betancur N., Ramos-Álamo A., Gómez-Marrero J., Cabrera-Ramírez L. (H. Universitario de Gran Canaria Dr. Negrín, Las Palmas de Gran Canaria, Spain), del Castillo Blanco A., Díaz-Antolín M.P. (H. Son LLátzer, Palma de Mallorca, Spain), Moreno I. (H. Universitario y Politécnico de La Fe, Valencia, Spain), Ledesma B. (H. Universitario Príncipe de Asturias, Alcalá de Henares, Spain), Nuñez M. (H. Álvaro Cunqueiro, Vigo, Spain), García-Bernedo C., Benítez-Cano A., Carazo-Cordobés J., Castellort Mascó L. (H. del Mar, Barcelona, Spain), Maseda E., Ramírez S., Suárez-de-la-Rica A., Montero-Feijoo A., Salgado P., Gilsanz F. (H. Universitario La Paz, Madrid, Spain), Tamayo E., de Vargas Martínez O., Flores-Crespo M. (H. Clínico Universitario, Valladolid, Spain), Picatto P., Castañón-Alonso E., Álvarez-Fernández R.A. (H. Universitario Central de Asturias, Oviedo, Spain), Forés B., Bengoetxea-Uriarte U.X., Freijo-Guerreo J.J., González-García J. (H. Universitario Basurto, Bilbao, Spain), Granizo J.J. (H. Universitario Infanta Cristina, Parla, Spain), Peláez-Peláez E. (H. Universitario Vall d'Hebron, Barcelona, Spain), Solera-Marín J. (H. Universitario de Canarias, Santa Cruz de Tenerife, Spain), Aliaño-Piña M. (H. Virgen de la Salud, Toledo, Spain), Ramasco F. (H. Universitario de la Princesa, Madrid, Spain), García-Álvarez R. (H. Universitario 12 de Octubre, Madrid, Spain), Giménez MJ (PRISM-AG, Madrid, Spain).  
Lead author for this group: Emilio Maseda, MD PhD; email: [emilio.maseda@gmail.com](mailto:emilio.maseda@gmail.com)

## Author Contributions

**Conceptualization:** Emilio Maseda, Alejandro Suárez-de-la-Rica.

**Formal analysis:** Emilio Maseda, María-José Giménez, Alejandro Suárez-de-la-Rica.

**Funding acquisition:** Emilio Maseda.

**Investigation:** Emilio Maseda, Sofía Ramírez, Pedro Picatto, Eva Peláez-Peláez, Carlos García-Bernedo, Nazario Ojeda-Betancur, Gerardo Aguilar, Beatriz Forés, Jorge Solera-Marín, María Aliaño-Piña, Eduardo Tamayo, Fernando Ramasco, Raquel García-Álvarez, Ada González-Lisorge, Alejandro Suárez-de-la-Rica.

**Project administration:** Emilio Maseda.

**Supervision:** Emilio Maseda.

**Writing – original draft:** Emilio Maseda, María-José Giménez, Alejandro Suárez-de-la-Rica.

**Writing – review & editing:** Emilio Maseda, Sofía Ramírez, Pedro Picatto, Eva Peláez-Peláez, Carlos García-Bernedo, Nazario Ojeda-Betancur, Gerardo Aguilar, Beatriz Forés, Jorge Solera-Marín, María Aliaño-Piña, Eduardo Tamayo, Fernando Ramasco, Raquel García-Álvarez, Ada González-Lisorge, María-José Giménez, Alejandro Suárez-de-la-Rica.

## References

1. van Ruler O, Boermeester MA. Surgical treatment of secondary peritonitis: A continuing problem. *Chirurg* 2017; 88(Suppl 1): 1–6. <https://doi.org/10.1007/s00104-015-0121-x> PMID: 26746213
2. Angus DC, van der Poll T. Severe sepsis and septic shock. *N Engl J Med* 2013; 369: 2063.
3. Salamone G, Licari L, Falco N, Augello G, Tutino R, Campanella S, et al. Mannheim Peritonitis Index (MPI) and elderly population: prognostic evaluation in acute secondary peritonitis. *G Chir* 2016; 37: 243–249. <https://doi.org/10.11138/gchir/2016.37.6.243> PMID: 28350970
4. Mazuski JE, Tessier JM, May AK, Sawyer RG, Nadler EP, Rosengart MR, et al. The Surgical Infection Society revised guidelines on the management of intra-abdominal infection. *Surg Infect (Larchmt)* 2017; 18: 1–76.
5. Doklešić SK, Bajec DD, Djukić RV, Bumbaširević V, Detanac AD, Detanac SD, et al. Secondary peritonitis—evaluation of 204 cases and literature review. *J Med Life* 2014; 7: 132–138. PMID: 25408716
6. Rausei S, Pappalardo V, Ruspi L, Colella A, Giudici S, Ardita V, et al. Early versus delayed source control in open abdomen management for severe intra-abdominal infections: A retrospective analysis on 111 cases. *World J Surg* 2018; 42: 707–712. <https://doi.org/10.1007/s00268-017-4233-y> PMID: 28936682
7. Hawser S, Hoban DJ, Badal RE, Bouchillon SK, Biedenbach D, Hackel M, et al. Epidemiology and antimicrobial susceptibility of gram-negative aerobic bacteria causing intra-abdominal infections during 2010–2011. *J Chemother* 2015; 27: 67–73. <https://doi.org/10.1179/1973947814Y.0000000164> PMID: 24548089
8. Lob SH, Badal RE, Bouchillon SK, Hawser SP, Hackel MA, Hoban DJ. Epidemiology and susceptibility of gram-negative appendicitis pathogens: SMART 2008–2010. *Surg Infect (Larchmt)* 2013; 14: 203–208.
9. Sartelli M, Weber DG, Ruppé E, Bassetti M, Wright BJ, Ansaloni L, et al. Antimicrobials: a global alliance for optimizing their rational use in intra-abdominal infections (AGORA). *World J Emerg Surg* 2016; 11: 33. <https://doi.org/10.1186/s13017-016-0089-y> PMID: 27429642
10. Global Alliance for Infections in Surgery. How to classify intra-abdominal infections. <https://infectionsinsurgery.org/how-to-classify-intra-abdominal-infections/>. Accessed 23 April 2018.
11. Kollef MH, Napolitano LM, Solomkin JS, Wunderink RG, Bae IG, Fowler VG, et al. Health care-associated infection (HAI): a critical appraisal of the emerging threat—proceedings of the HAI Summit. *Clin Infect Dis* 2008; 47(Suppl 2): S55–S99.
12. Zalacain M, Biedenbach DJ, Badal RE, Young K, Motyl M, Sahm DF. Pathogen prevalence and antimicrobial susceptibility among Enterobacteriaceae causing hospital-associated intra-abdominal infections in adults in the United States (2012–2013). *Clin Ther* 2016; 38: 1510–1521. <https://doi.org/10.1016/j.clinthera.2016.04.035> PMID: 27234360
13. Hackel MA, Badal RE, Bouchillon SK, Biedenbach DJ, Hoban DJ. Resistance rates of intra-abdominal isolates from intensive care units and non-intensive care units in the United States: The Study for Monitoring Antimicrobial Resistance Trends 2010–2012. *Surg Infect (Larchmt)* 2015; 16: 298–304.
14. Di Pasquale M, Ferrer M, Esperatti M, Crisafulli E, Giunta V, Li Bassi G, et al. Assessment of severity of ICU-acquired pneumonia and association with etiology. *Crit Care Med* 2014; 42: 303–312. <https://doi.org/10.1097/CCM.0b013e3182a272a2> PMID: 23989176
15. Vallés J, Martín-Loeches I, Torres A, Diaz E, Seijas I, López MJ, et al. Epidemiology, antibiotic therapy and clinical outcomes of healthcare-associated pneumonia in critically ill patients: a Spanish cohort study. *Intensive Care Med* 2014; 40: 572–581. <https://doi.org/10.1007/s00134-014-3239-2> PMID: 24638939
16. Bassetti M, Peghin M, Carnelutti A, Righi E, Merelli M, Ansaldo F, et al. Clinical characteristics and predictors of mortality in cirrhotic patients with candidemia and intra-abdominal candidiasis: a multicenter study. *Intensive Care Med* 2017; 43: 509–518. <https://doi.org/10.1007/s00134-017-4717-0> PMID: 28271321
17. Mahoney FI, Barthel DW. Functional evaluation: The Barthel index. *Md State Med J* 1965; 14: 61–65.
18. Vincent JL, Moreno R, Takala J, Willatts S, De Mendonça A, Bruining H, et al. The SOFA (Sepsis-related Organ Failure Assessment) score to describe organ dysfunction/failure. *Intensive Care Med* 1996; 22: 707–710. <https://doi.org/10.1007/bf01709751> PMID: 8844239
19. Le Gall JR, Lemeshow S, Saulnier F. A new simplified acute physiologic score (SAPS-II) based on a European/North-American multicenter study. *JAMA* 1993; 270: 2957–2963. <https://doi.org/10.1001/jama.270.24.2957> PMID: 8254858
20. Solomkin JS, Mazuski JE, Bradley JS, Rodvold KA, Goldstein EJ, Baron EJ, et al. Diagnosis and management of complicated intra-abdominal infection in adults and children: guidelines by the Surgical

- Infection Society and the Infectious Diseases Society of America. *Clin Infect Dis* 2010; 50: 133–164. <https://doi.org/10.1086/649554> PMID: 20034345
21. Maseda E, Mensa J, Valía JC, Gomez-Herreras JI, Ramasco F, Samsó E, et al. Bugs, hosts and ICU environment: countering pan-resistance in nosocomial microbiota and treating bacterial infections in the critical care setting. *Rev Esp Quimioter* 2013; 26: 312–331. PMID: 24399345
  22. Labricciosa FM, Sartelli M, Abbo LM, Barbadoro P, Ansaloni L, Coccolini F, et al. Epidemiology and risk factors for isolation of multi-drug-resistant organisms in patients with complicated intra-abdominal infections. *Surg Infect (Larchmt)* 2018; 19: 264–272.
  23. Swenson BR, Metzger R, Hedrick TL, McElearney ST, Evans HL, Smith RL, et al. Choosing antibiotics for intra-abdominal infections: what do we mean by "high risk"? *Surg Infect (Larchmt)* 2009; 10: 29–39.
  24. Hawser SP, Bouchillon SK, Hoban DJ, Badal RE. In vitro susceptibilities of aerobic and facultative anaerobic gram-negative bacilli from patients with intra-abdominal infections worldwide from 2005–2007: results from the SMART study. *Int J Antimicrob Agents* 2009; 34: 585–588. <https://doi.org/10.1016/j.ijantimicag.2009.07.013> PMID: 19748234
  25. Hawser SP, Badal RE, Bouchillon SK, Hoban DJ, Hackel MA, Biedenbach DJ, et al. Susceptibility of gram-negative aerobic bacilli from intra-abdominal pathogens to antimicrobial agents collected in the United States during 2011. *J Infect* 2014; 68: 71–76. <https://doi.org/10.1016/j.jinf.2013.09.001> PMID: 24016768
  26. Chong YP, Bae IG, Lee SR, Chung JW, Jun JB, Choo EJ, et al. Clinical and economic consequences of failure of initial antibiotic therapy for patients with community-onset complicated intra-abdominal infections. *PLoS One* 2015; 10: e0119956. <https://doi.org/10.1371/journal.pone.0119956> PMID: 25910171
  27. Skalweit MJ. Profile of ceftolozane/tazobactam and its potential in the treatment of complicated intra-abdominal infections. *Drug Des Devel Ther* 2015; 9: 2919–2925. <https://doi.org/10.2147/DDDT.S61436> PMID: 26082619
  28. de Ruiter J1, Weel J, Manusama E, Kingma WP, van der Voort PH. The epidemiology of intra-abdominal flora in critically ill patients with secondary and tertiary abdominal sepsis. *Infection* 2009; 37: 522–527. <https://doi.org/10.1007/s15010-009-8249-6> PMID: 19669089
  29. Montravers P, Chalfine A, Gauzit R, Lepape A, Pierre Marmuse J, Vouillot C, et al. Clinical and therapeutic features of nonpostoperative nosocomial intra-abdominal infections. *Ann Surg* 2004; 239: 409–416. <https://doi.org/10.1097/01.sla.0000114214.68169.e9> PMID: 15075660
  30. Lob SH, Kazmierczak KM, Badal RE, Hackel MA, Bouchillon SK, Biedenbach DJ, et al. Trends in susceptibility of *Escherichia coli* from intra-abdominal infections to ertapenem and comparators in the United States according to data from the SMART program, 2009 to 2013. *Antimicrob Agents Chemother* 2015; 59: 3606–3610. <https://doi.org/10.1128/AAC.05186-14> PMID: 25801558
  31. Gauzit R, Péan Y, Barth X, Mistretta F, Lalaude O; Top Study Team. Epidemiology, management, and prognosis of secondary non-postoperative peritonitis: a French prospective observational multicenter study. *Surg Infect (Larchmt)* 2009; 10: 119–127.
  32. Dupont H, Guilbart M, Ntoubá A, Perquin M, Petiot S, Regimbeau JM, et al. Can yeast isolation be predicted in complicated secondary non-postoperative intra-abdominal infections?. *Crit Care* 2015; 19: 60. <https://doi.org/10.1186/s13054-015-0790-3> PMID: 25849844
  33. Adrie C, Garrouste-Orgeas M, Ibn Essaïed W, Schwebel C, Darmon M, Mourvillier B, et al. Attributable mortality of ICU-acquired bloodstream infections: Impact of the source, causative micro-organism, resistance profile and antimicrobial therapy. *J Infect* 2017; 74: 131–141. <https://doi.org/10.1016/j.jinf.2016.11.001> PMID: 27838521
  34. Salamone G, Licari L, Falco N, Augello G, Tutino R, Campanella S, et al. Mannheim Peritonitis Index (MPI) and elderly population: prognostic evaluation in acute secondary peritonitis. *G Chir* 2016; 37: 243–249. <https://doi.org/10.11138/gchir/2016.37.6.243> PMID: 28350970
  35. Montravers P, Dupont H, Gauzit R, Veber B, Auboyer C, Blin P, et al. *Candida* as a risk factor for mortality in peritonitis. *Crit Care Med* 2006; 34: 646–652. <https://doi.org/10.1097/01.CCM.0000201889.39443.D2> PMID: 16505648
  36. Bassetti M, Marchetti M, Chakrabarti A, Colizza S, Garnacho-Montero J, Kett DH, et al. A research agenda on the management of intra-abdominal candidiasis: results from a consensus of multinational experts. *Intensive Care Med* 2013; 39: 2092–2106. <https://doi.org/10.1007/s00134-013-3109-3> PMID: 24105327
